# Supplementary material for: Simultaneous Determination of Ciprofloxacin and Ofloxacin in Animal Tissues with the Use of Capillary Electrophoresis with Transient Pseudo-Isotachophoresis
Source: MDPI journal article supplement (doi:10.3390/molecules26226931), 2021-11-17
Supplement: s1 [file s1]

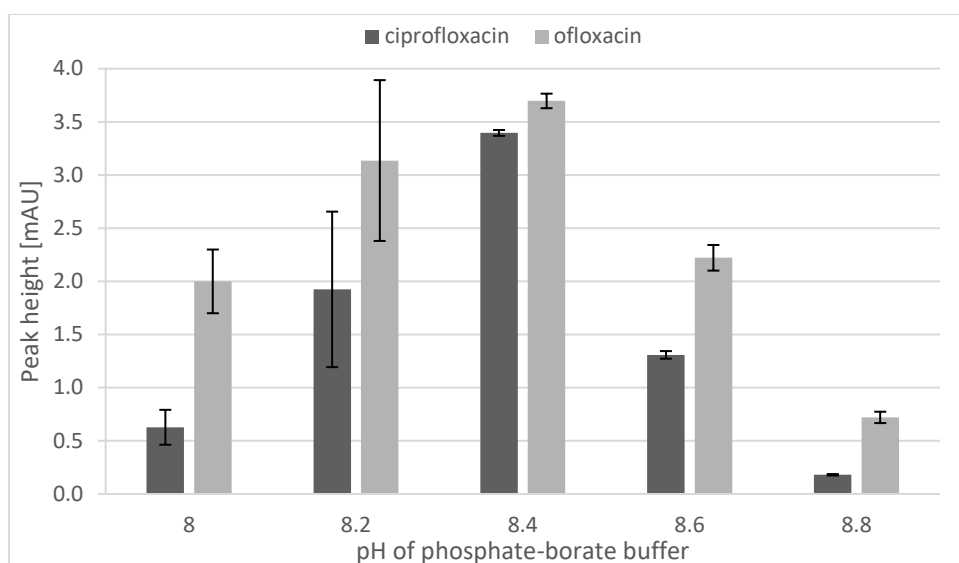

**Figure S1.** The relationship between the peak height and the pH of the background electrolyte .

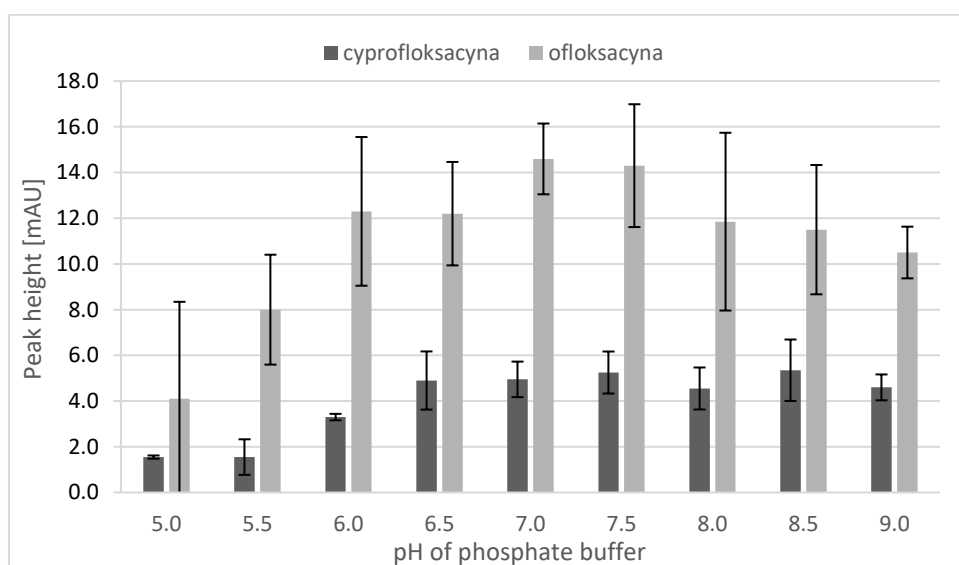

**Figure S2.** The relationship between the peak height and the pH of the buffer for sample preparation.

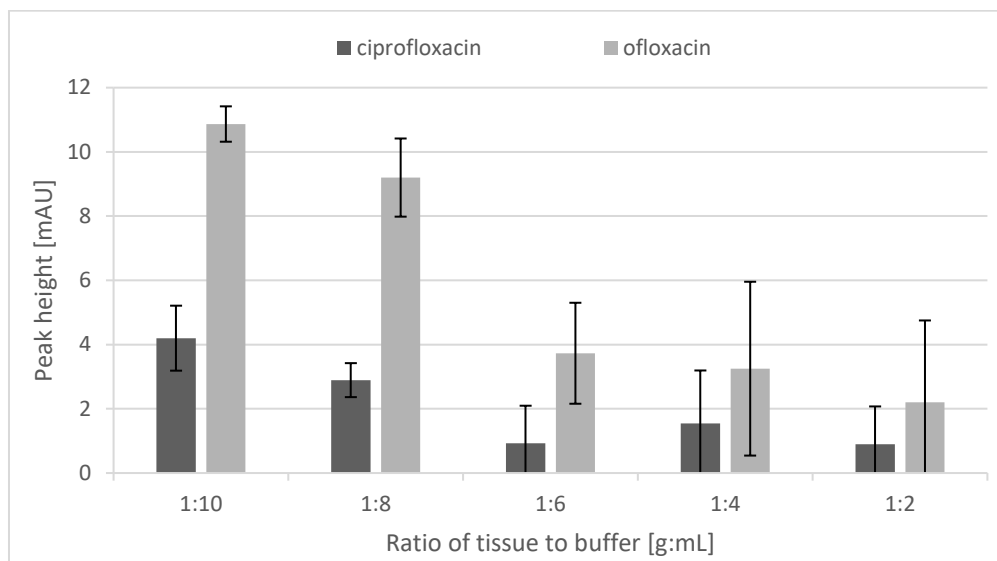

**Figure S3.** The relationship between the peak height and the ratio of tissue to 0.2 mol/L phosphate buffer.

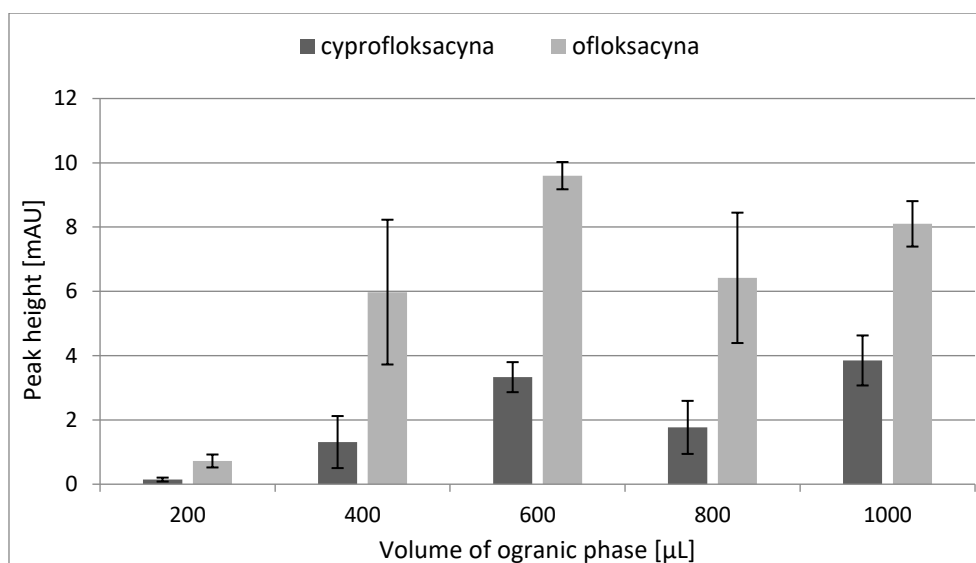

**Figure S4.** The relationship between the peak height and the volume of organic phase.

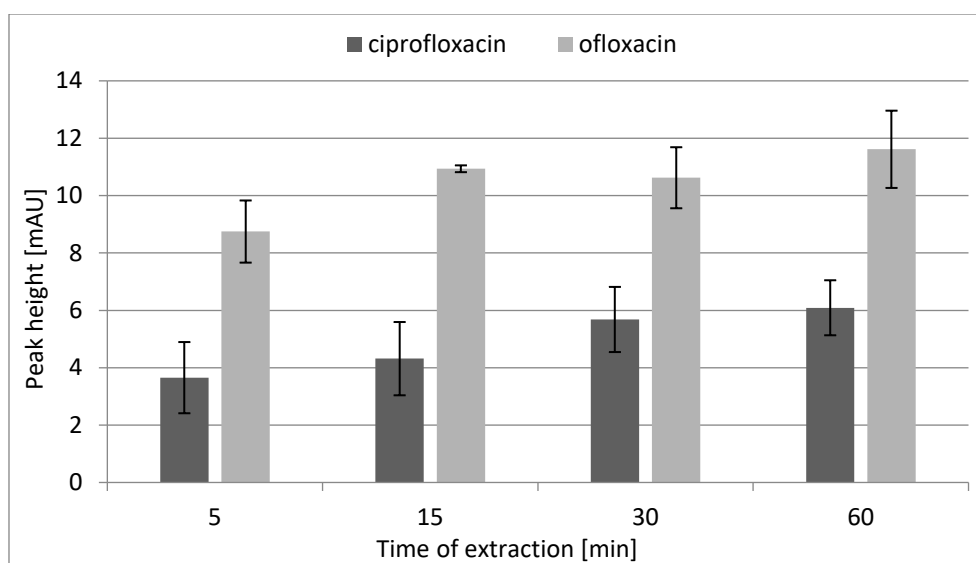

**Figure S5.** The relationship between the peak height and the time of extraction.

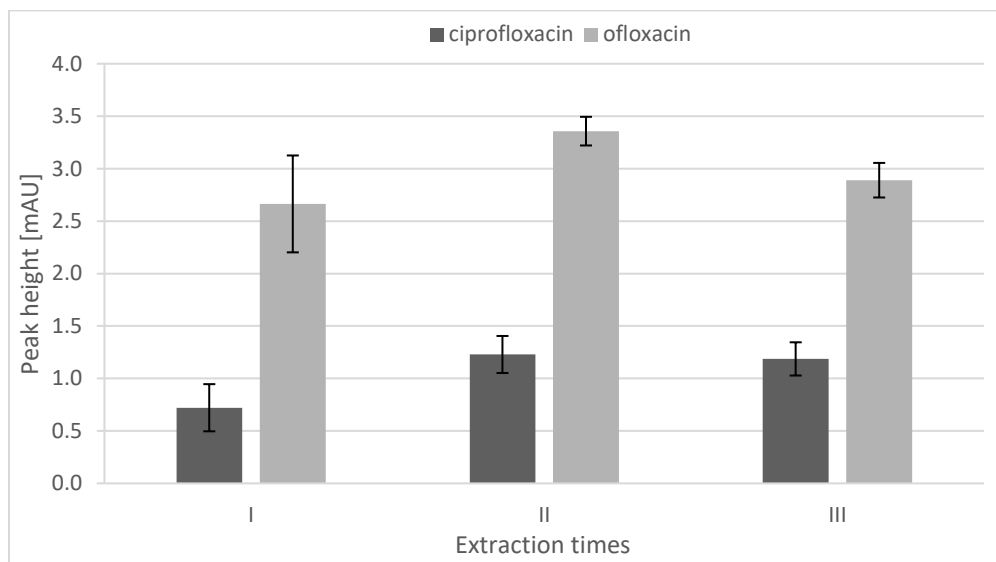

**Figure S6.** The relationship between the peak height and the times of extraction.

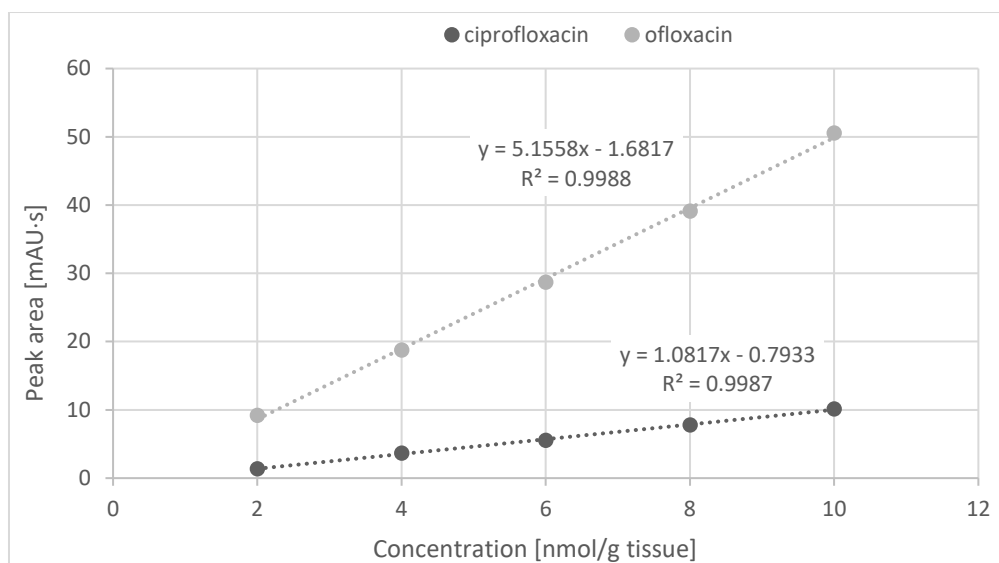

**Figure S7.** Calibration curves.
